# Supplementary material for: Comparison of percutaneous endoscopic lumbar discectomy versus microendoscopic discectomy for the treatment of lumbar disc herniation: a meta-analysis
Source: Springer Nature journal article supplement (doi:10.1007/s00264-018-4253-8), 2018-12-13
Supplement: MOESM1 [file 16340066]

Supplementary Table 1. Quality assessment of studies in the meta-analysis based on the modified Jadad score with eight items

| Items assessed | A | B | C | D | E | F | G | H | Scores |
| --- | --- | --- | --- | --- | --- | --- | --- | --- | --- |
| Wu, X. C., et al., 2009[16] | 1 | 1 | 0 | 0 | 1 | 1 | 1 | 1 | 6 |
| Yoon, S. M., et al., 2012[17] | 0 | 0 | 0 | 0 | 1 | 1 | 1 | 1 | 4 |
| Yang, L., et al., 2015[18] | 0 | 0 | 0 | 0 | 1 | 1 | 1 | 1 | 4 |
| Sinkemani, A. et al., 2015[12] | 0 | 0 | 0 | 0 | 1 | 1 | 1 | 1 | 4 |
| Duan, X. F. et al., 2016[19] | 1 | 0 | 0 | 0 | 1 | 1 | 1 | 1 | 5 |
| Zhao, X. W., et al., 2016[20] | 0 | 0 | 0 | 0 | 1 | 1 | 1 | 1 | 4 |
| Ding, Y. Z., et al., 2017[21] | 1 | 1 | 0 | 0 | 1 | 1 | 1 | 1 | 6 |
| Li, Z. Y., et al., 2017[22] | 1 | 0 | 0 | 0 | 1 | 1 | 1 | 1 | 5 |
| Liu, H. P. et al., 2017[23] | 0 | 0 | 0 | 0 | 1 | 1 | 1 | 1 | 4 |
| Luo, D. K., et al., 2017[24] | 0 | 0 | 0 | 0 | 1 | 1 | 1 | 1 | 4 |
| Qu, J. X., et al., 2017[25] | 1 | 1 | 0 | 0 | 1 | 1 | 1 | 1 | 6 |
| Song, H. P., et al., 2017[26] | 0 | 0 | 0 | 0 | 1 | 1 | 1 | 1 | 4 |
| Chen, Q., et al., 2018[27] | 1 | 1 | 0 | 0 | 1 | 1 | 1 | 1 | 6 |
| Wu, Y. M., et al., 2018[28] | 0 | 0 | 0 | 0 | 1 | 1 | 1 | 1 | 4 |
| Chen, Z., et al., 2018[30] | 1 | 1 | 1 | 1 | 1 | 1 | 1 | 1 | 8 |
| Li, H., et al., 2018[31] | 0 | 0 | 0 | 0 | 1 | 1 | 1 | 1 | 4 |
| Liu, X., et al., 2018[32] | 0 | 0 | 0 | 0 | 1 | 1 | 1 | 1 | 4 |
| Abudurexiti, T., et al., 2018[29] | 0 | 0 | 0 | 0 | 1 | 1 | 1 | 1 | 4 |

Note: A, Was the study described as randomized? B, Was the method of randomization appropriate? C, Was the study described as blinded? D, Was the method of blinding appropriate? E, Was there a description of withdrawals and dropouts? F, Was there a clear description of the inclusion/exclusion criteria? G, Was the method used to assess adverse effects described? H, Was the method of statistical analysis described? 0 = No or Not described; 1 = Yes


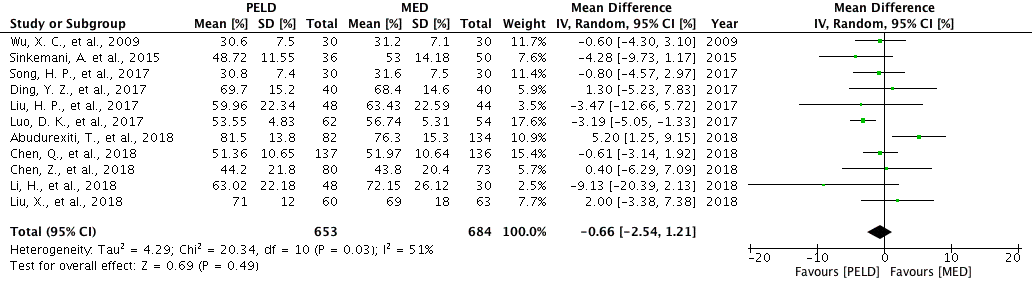


Supplementary Figure 1. Forest plot for preoperative ODI (PELD versus MED). No significant difference was found between the two groups.


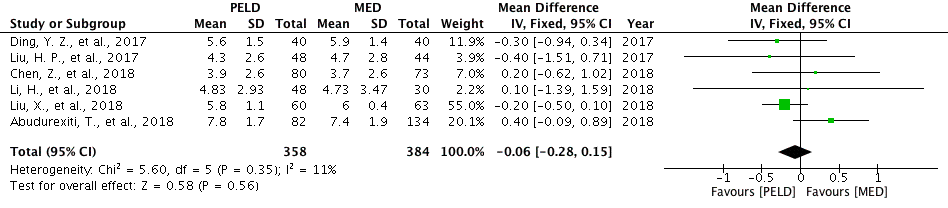


Supplementary Figure 2. Forest plot for preoperative VAS-back pain (PELD versus MED). No significant difference was found between the two groups.


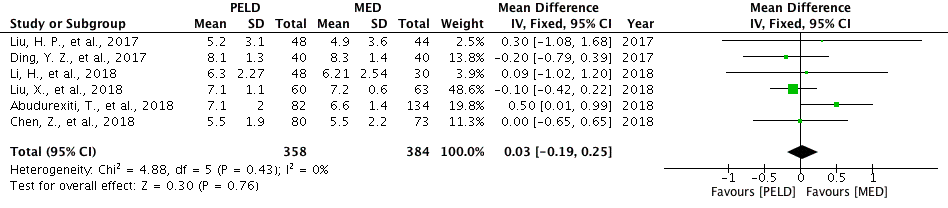


Supplementary Figure 3. Forest plot for preoperative VAS-leg pain (PELD versus MED). No significant difference was found between the two groups.


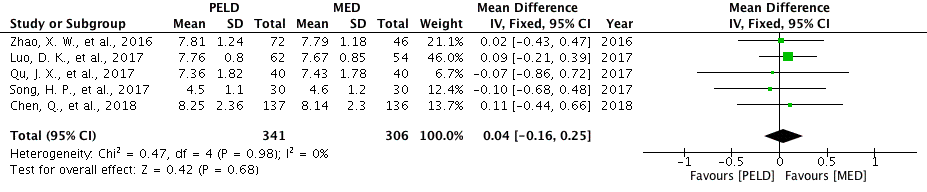


Supplementary Figure 4. Forest plot for preoperative VAS-unspecified (PELD versus MED). No significant difference was found between the two groups.
